# Supplementary material for: In vitrodigestion of protein and starch in sponge cakes formulated with pea (Pisum sativumL.) ingredients
Source: Royal Society of Chemistry journal article supplement (doi:10.1039/d1fo03601g), 2022-01-01
Supplement: d1fo03601g2.xlsx [file d1fo03601g2.xlsx]

## Sheet: TableS1
	Chemical composition of raw materials
	Raw material	Moisture			Ash			Starch			Protein			Fiber			Lipid
		[%]			[%]			[%]			[%]			[%]			[%]
	Wheat flour	12.1	±	0	0.9	±	0.4	76	±	0.7	9.7	±	0.4	3.4	±	1.3	1.6	±	0.1
	Pea flour	8.8	±	0.1	3.5	±	0.4	47.6	±	5.1	23.8	±	0.7	8.2	±	1.9	2	±	0.1
	Pea protein isolate	5.2	±	0.1	6	±	0.4	n.d.			81.7	±	2.5	n.d.			1.2	±	0
	Pea starch	10.2	±	0.1	<0.5			88.9	±	1.9	<0.5			0.9	±	0.8	<0.1
	Maize starch	13.2	±	0	<0.4			86.8	±	1.1	<0.6			<0.5			<0.1
	Mean ± standard deviation (n = 2-3)
	n.d. = not determined
