# Supplementary material for: In vitrodigestion of protein and starch in sponge cakes formulated with pea (Pisum sativumL.) ingredients
Source: Royal Society of Chemistry journal article supplement (doi:10.1039/d1fo03601g), 2022-01-01
Supplement: d1fo03601g3.xlsx [file d1fo03601g3.xlsx]

## Sheet: TableS2
	Kinetic parameters of protein digestion
	Cake	k			Relative RBP								Absolute RBP							R2adj		Abbreviations
					Proteinf			Initial reaction rate			RMSE		Proteinf			Initial reaction rate			RMSE			RBP	Readily bioaccessible protein
		[1/min]			[%]			[%/min]					[mg/g cake]			[mg/(g*min)]						k	Reaction rate constant
	Wheat flour cake	0.0288547	±	0.005a	30.0817	±	1.39b,c	0.710969	±	0.13a	1.896		33.0277	±	1.52b	0.780611	±	0.13b	2.081	0.963298		Proteinf	Readily bioaccessible protein at extended digestion times
	Pea flour cake	0.0336651	±	0.006a	29.803	±	1.30b,c	0.72467	±	0.15a	1.957		45.6116	±	1.98a	1.10959	±	0.22a,b	2.995	0.94874		RMSE	Root mean square error
	Pea protein + pea starch cake	0.0379786	±	0.007a	25.7612	±	1.11d	0.80378	±	0.15a	1.783		42.3748	±	1.82a	1.3218	±	0.24a	2.933	0.955338		R2adj	Adjusted coefficient of determination
	Pea protein + maize starch cake	0.0359197	±	0.005a	26.7783	±	0.86c,d	0.767948	±	0.10a	1.337		42.8875	±	1.37a	1.23011	±	0.17a,b	2.142	0.97574
	Pea starch cake	0.0421773	±	0.007a	32.6614	±	1.25a,b	1.12103	±	0.19a	2.332		23.8494	±	0.92c	0.818581	±	0.14b	1.682	0.95996
	Maize starch cake	0.0416256	±	0.007a	34.6679	±	1.39a	1.13675	±	0.20a	2.115		25.0108	±	1.00c	0.820558	±	0.15b	1.545	0.953504
	Estimated values ± standard error
	Fractional conversion model
