# Supplementary material for: In vitrodigestion of protein and starch in sponge cakes formulated with pea (Pisum sativumL.) ingredients
Source: Royal Society of Chemistry journal article supplement (doi:10.1039/d1fo03601g), 2022-01-01
Supplement: d1fo03601g4.xlsx [file d1fo03601g4.xlsx]

## Sheet: TableS3
	Kinetic parameters of starch digestion
	High Performance Anion Exchange Chromatography coupled with Pulsed Amperometric Detection (HPAEC-PAD) method																																Abbreviations
	Quantification of glucose, maltose and maltotriose																																Starch1	Digested starch at the end of phase 1
																																	Starch2	Digested starch at the end of phase 2
	Cake	k1			k2			Time of phase transition	Relative digested starch [%]												Absolute digested starch [mg/g cake]										R2adj		k1	Estimated reaction rate constant of the first phase
									Starch1			Starch2			HI	Initial reaction rate			RMSE		Starch1			Starch2			Initial reaction rate			RMSE			k2	Estimated reaction rate constant of the second phase
		[1/min]			[1/min]			[min]	[%]			[%]				[%/min]					[mg/g cake]			[mg/g cake]			[mg/(gꞏmin)]						HI	Hydrolysis index
	Wheat flour cake	0.786448	±	0.40a	0.0223755	±	0.006a	5.18545	78.4524	±	2a	100	±	0a	100	62.4427	±	33a	2.143		198.6	±	8b	253.2	±	0b	158.147	±	83a,b	5.426	0.996383		RMSE	Root mean square error
	Pea flour cake	0.336245	±	0.07a	0.0135721	±	0.009a	9.23761	67.7802	±	4b,c	94.7993	±	6a,b	86.2963	23.4546	±	5a	2.713		125.518	±	8d	173.219	±	10d	42.923	±	9b	4.96	0.99		R2adj	Adjusted coefficient of determination
	Pea protein + pea starch cake	0.384747	±	0.09a	0.0167484	±	0.009a	7.86784	63.835	±	5c	89.9726	±	4b	83.5645	25.2847	±	6a	2.613		149.711	±	11c	208.467	±	10c	58.5839	±	14a,b	6.054	0.99
	Pea protein + maize starch cake	0.620425	±	0.23a	0.0105663	±	0.002a	5.9462	70	±	3a,b,c	100	±	0a	88.5015	43.7981	±	17a	2.79		154.855	±	6c	221.5	±	0c	96.7801	±	37a,b	6.134	0.990705
	Pea starch cake	0.352782	±	0.06a	0.0106673	±	0.003a	9.64574	74.3825	±	3a,b	100	±	0a	90.4501	26.5141	±	5a	3.051		240.577	±	11a	323.4	±	0a	85.4077	±	16a,b	9.588	0.989914
	Maize starch cake	0.723273	±	0.28a	0.0140281	±	0.003a	5.51136	77.8986	±	2a,b	100	±	0a	96.239	56.8263	±	23a	2.217		247.484	±	8a	316.7	±	0a	179.979	±	74a	7.021	0.994843
	Estimated values ± standard error
	3,5-Dinitrosalicylic acid (DNS) method
	Quantification of reducing sugars
	Cake	k1			k2			Time of phase transition	Relative digested starch [%]												Absolute digested starch [mg/g cake]										R2adj
									Starch1			Starch2			HI	Initial reaction rate			RMSE		Starch1			Starch2			Initial reaction rate			RMSE
		[1/min]			[1/min]			[min]	[%]			[%]				[%/min]					[mg/g cake]			[mg/g cake]			[mg/(gꞏmin)]
	Wheat flour cake	0.582715	±	0.08a	0.0132332	±	0.003a	7.53716	88.4666	±	1a	100	±	0a	100	51.7034	±	7a,b	1.352		224.006	±	5a	253.2	±	7b	130.894	±	20a,b	3.422	0.998146
	Pea flour cake	0.39473	±	0.09a	0.00886196	±	0.001a	7.56821	56.2674	±	3d	100	±	0a	74.5657	22.598	±	5b	2.569		102.861	±	5c	182.8	±	0d	41.2971	±	9c	4.696	0.991081
	Pea protein + pea starch cake	0.392977	±	0.10a	0.0175898	±	0.008a	7.19349	59.0821	±	4c,d	88.5091	±	4b	78.6996	23.7355	±	6a,b	2.477		136.915	±	10b	205.087	±	8c	54.9704	±	14a,b,c	5.74	0.991543
	Pea protein + maize starch cake	0.878813	±	0.37a	0.0167567	±	0.001a	3.82908	64.2633	±	1b,c	100	±	0a	88.166	57.0742	±	25a	1.08		142.343	±	3b	221.5	±	0c	126.417	±	55a,b,c	2.391	0.998689
	Pea starch cake	0.388108	±	0.04a	0.0105671	±	0.003a	8.50571	68.2101	±	2b	97.4442	±	0a	83.6802	26.7818	±	3a,b	1.213		220.788	±	6a	315.346	±	12a	86.6987	±	9b,c	3.922	0.998152
	Maize starch cake	0.716924	±	0.21a	0.0136367	±	0.001a	4.80568	66.5417	±	2b	100	±	0a	87.0316	48.1616	±	14a,b	1.418		210.738	±	5a	316.7	±	0a	152.52	±	45a	4.491	0.997655
	Estimated values ± standard error
