# Supplementary figures and images for: In vitrodigestion of protein and starch in sponge cakes formulated with pea (Pisum sativumL.) ingredients
Source: Royal Society of Chemistry journal article supplement (doi:10.1039/d1fo03601g), 2022-01-01

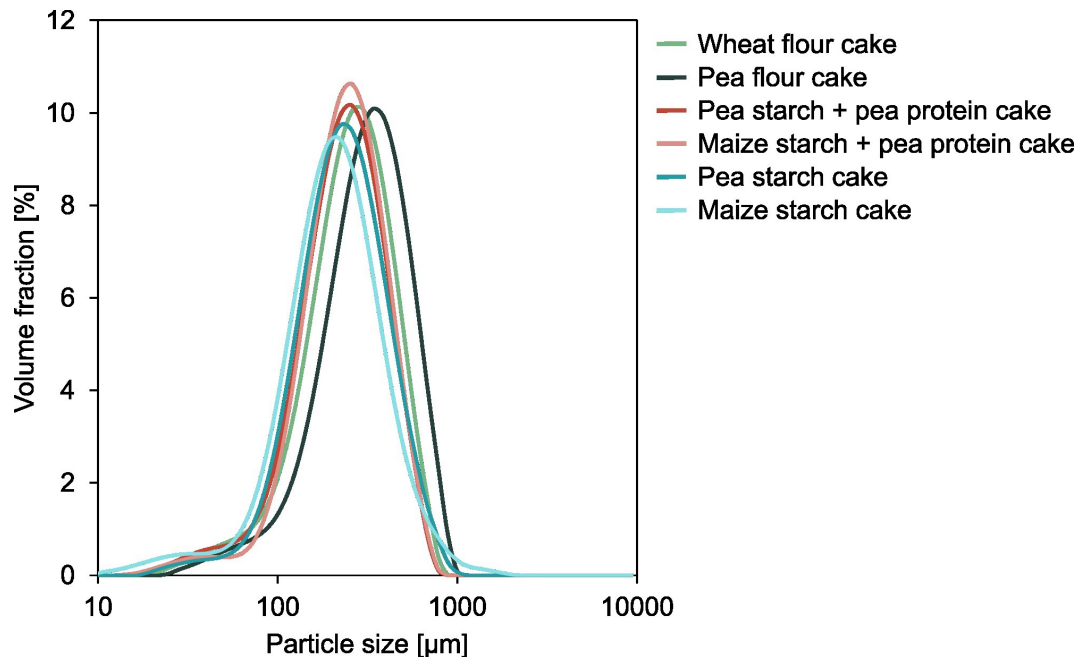

Supplement: d1fo03601g1.pdf [file d1fo03601g1.pdf]
